# Supplementary material for: Nitrogen export from a boreal stream network following forest harvesting: seasonal nitrate removal and conservative export of organic forms
Source: Copernicus journal article supplement (doi:10.5194/bg-13-1-2016), 2016-01-14
Supplement: Supplementary file 1 [file bg-13-1-2016-supplement.pdf]

Supplement of Biogeosciences, 13, 1–12, 2016  
<http://www.biogeosciences.net/13/1/2016/>  
doi:10.5194/bg-13-1-2016-supplement  
© Author(s) 2016. CC Attribution 3.0 License.

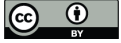

Biogeosciences  Open Access

*Supplement of*

## **Nitrogen export from a boreal stream network following forest harvesting: seasonal nitrate removal and conservative export of organic forms**

**J. Schelker et al.**

*Correspondence to:* J. Schelker ([jakob.schelker@univie.ac.at](mailto:jakob.schelker@univie.ac.at))

The copyright of individual parts of the supplement might differ from the CC-BY 3.0 licence.

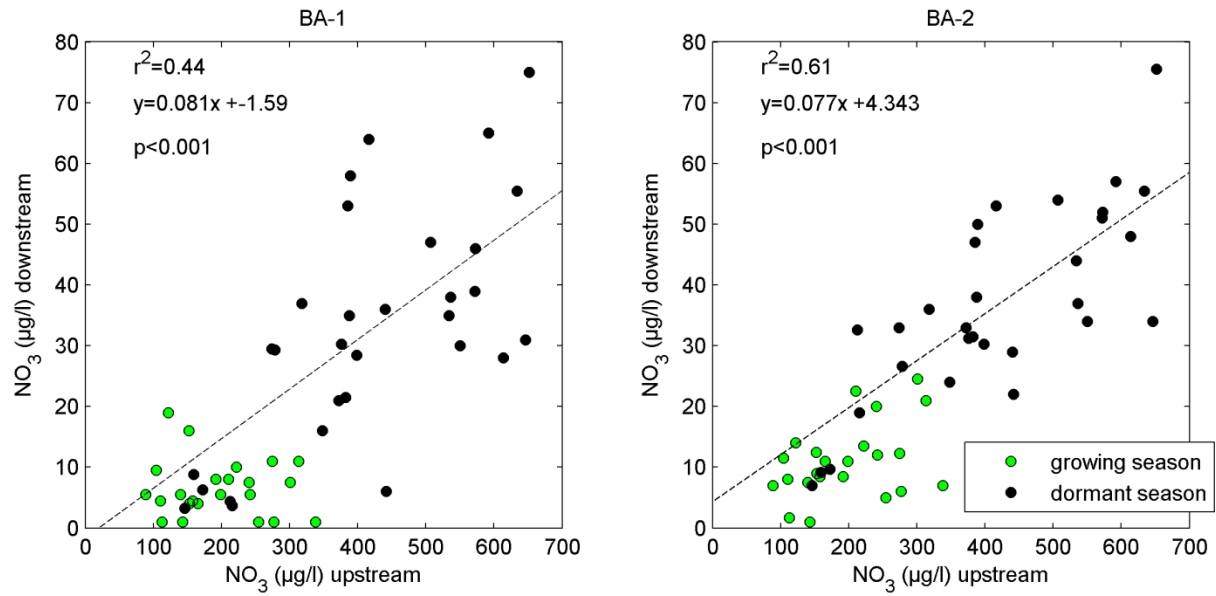

Figure S1: Nitrate ( $\text{NO}_3^-$ ) concentrations at the downstream sites BA-1 (size = 22.9 km<sup>2</sup>) and BA-2 (size = 8.7 km<sup>2</sup>) as a function of the concentrations measured at CC-4 clear-cut catchment during 2008-2011. Significant linear relationships were found for the entire dataset (not shown) and the dormant season (shown in figure), whereas no such relationships were found for the growing season.
